# Supplementary material for: Exome sequencing in families with chronic central serous chorioretinopathy
Source: PubMed Central journal article supplement (PMC6465660; doi:10.1002/mgg3.576), 2019-02-06

**A. Family 3**

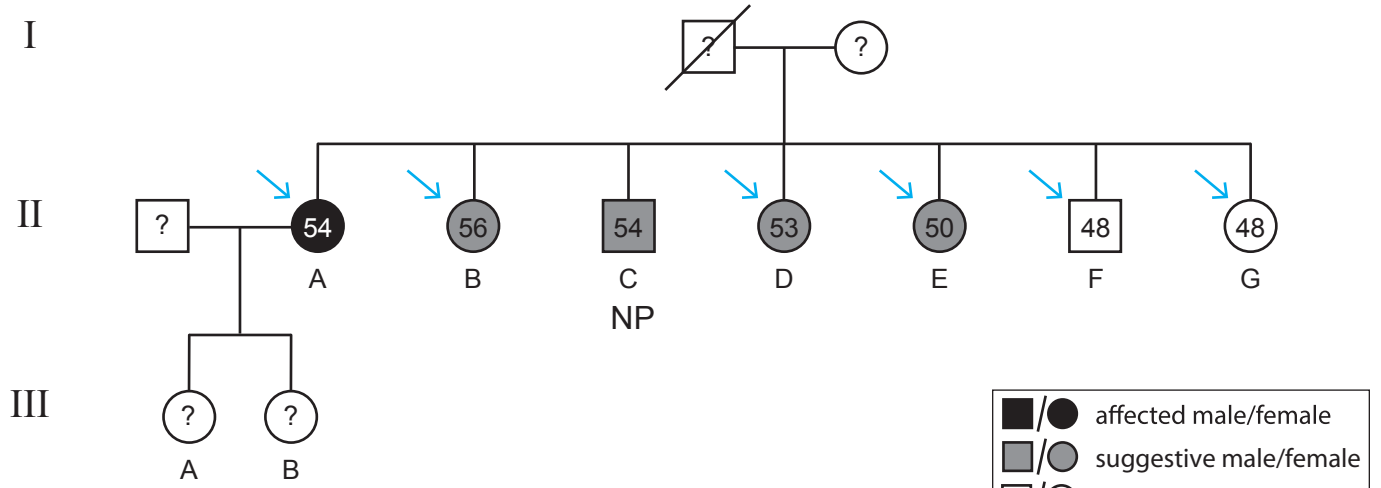

**B. Family 4**

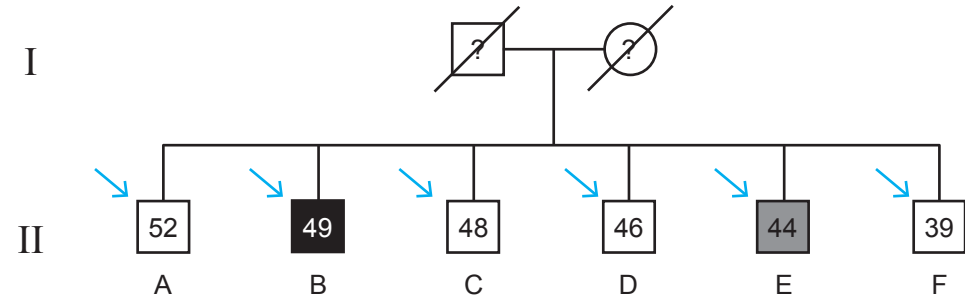

**C. Family 5**

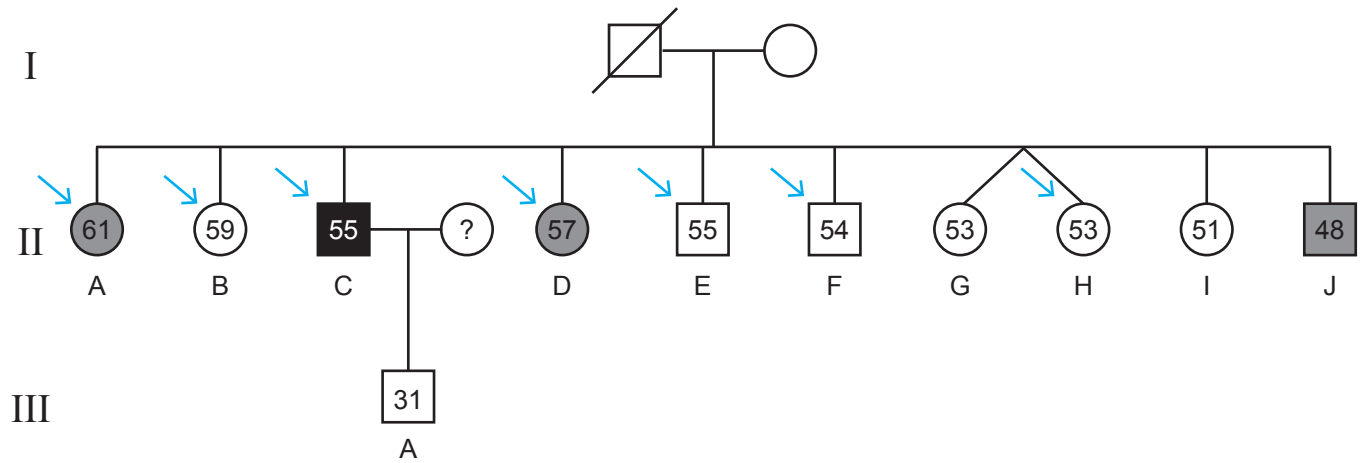

**D. Family 6**

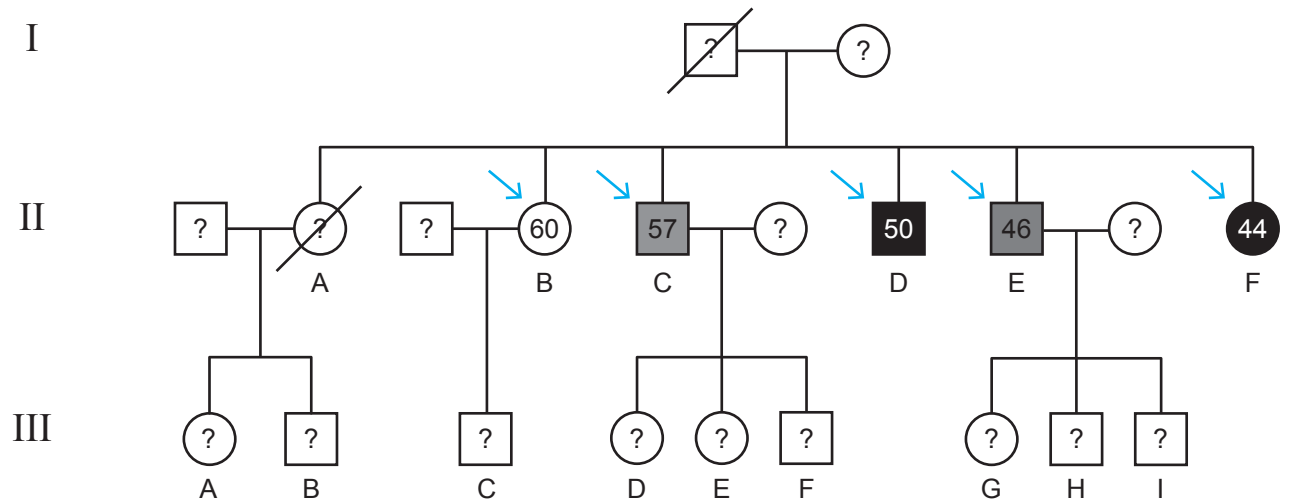

**E.** Family 7

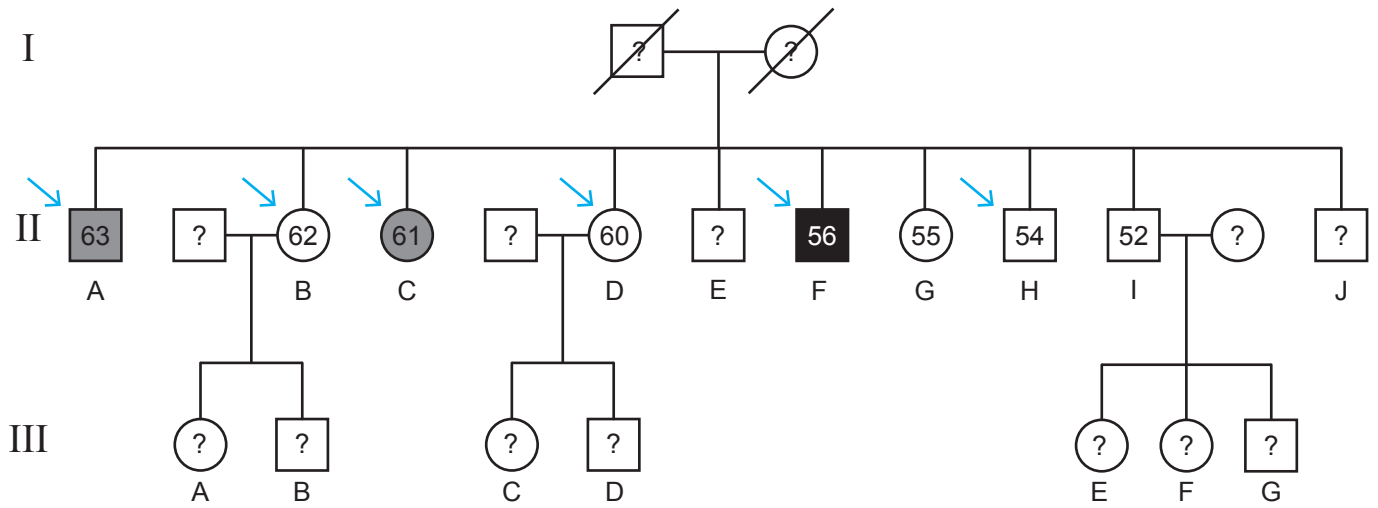

**F.** Family 8

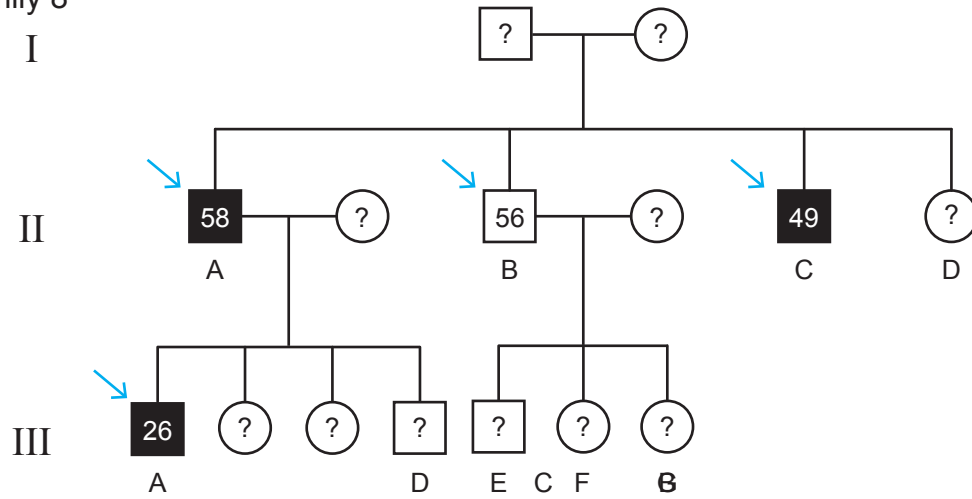

**G.** Family 9

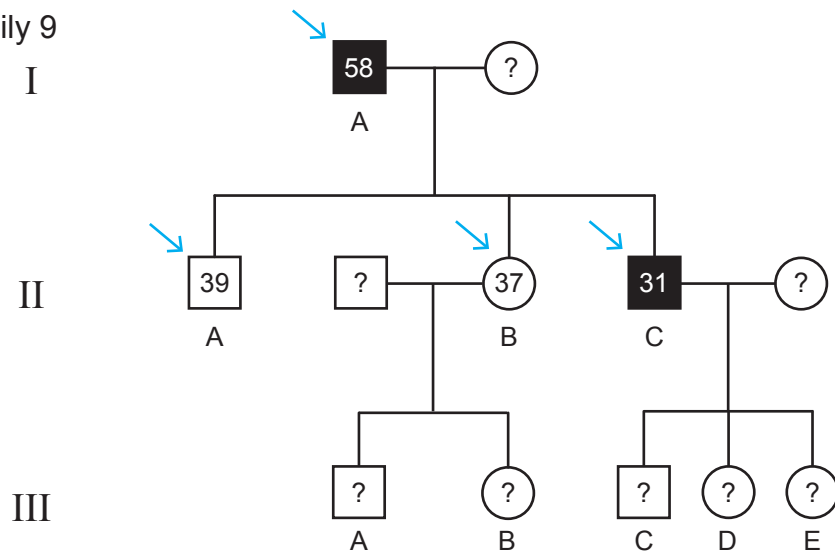

**H.** Family 10

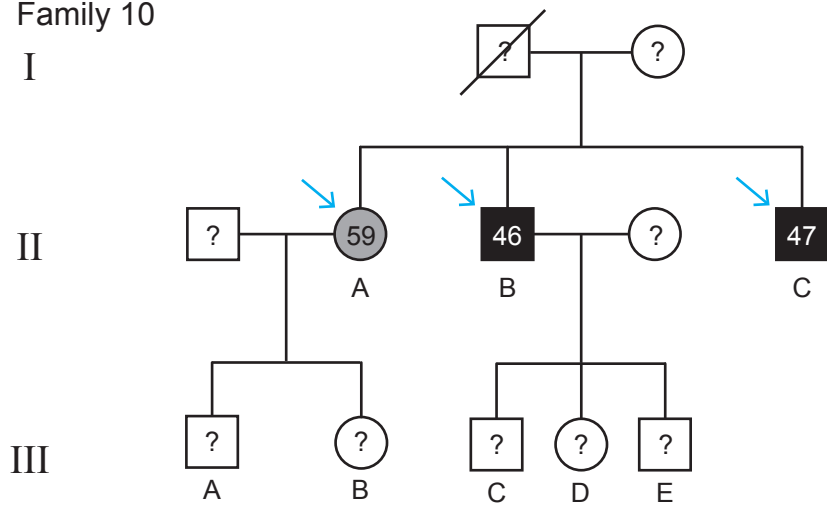

**I.** Family 11

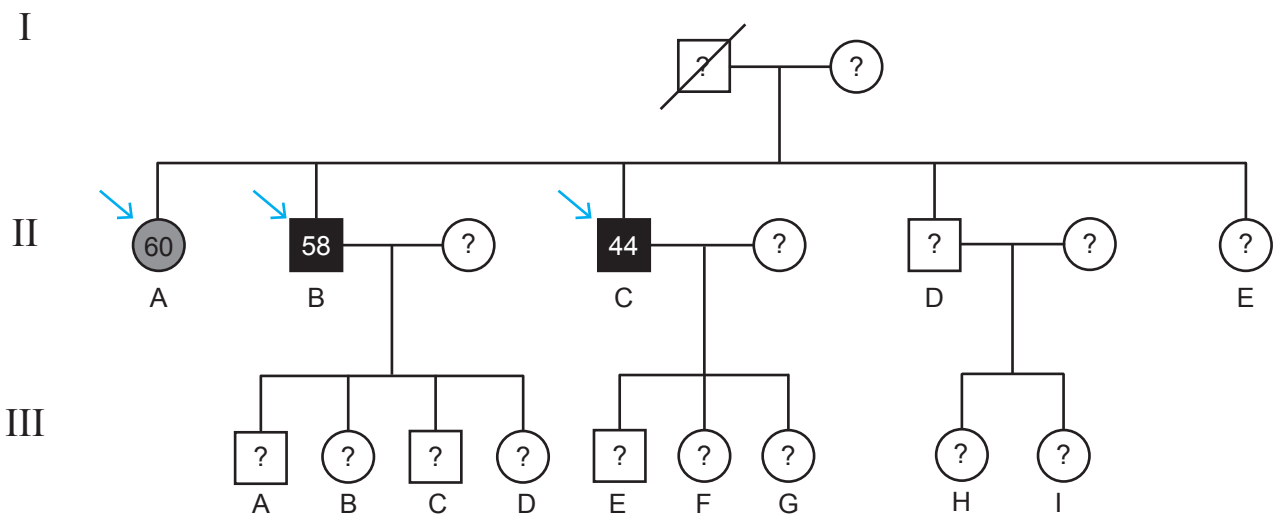

**J.** Family 12

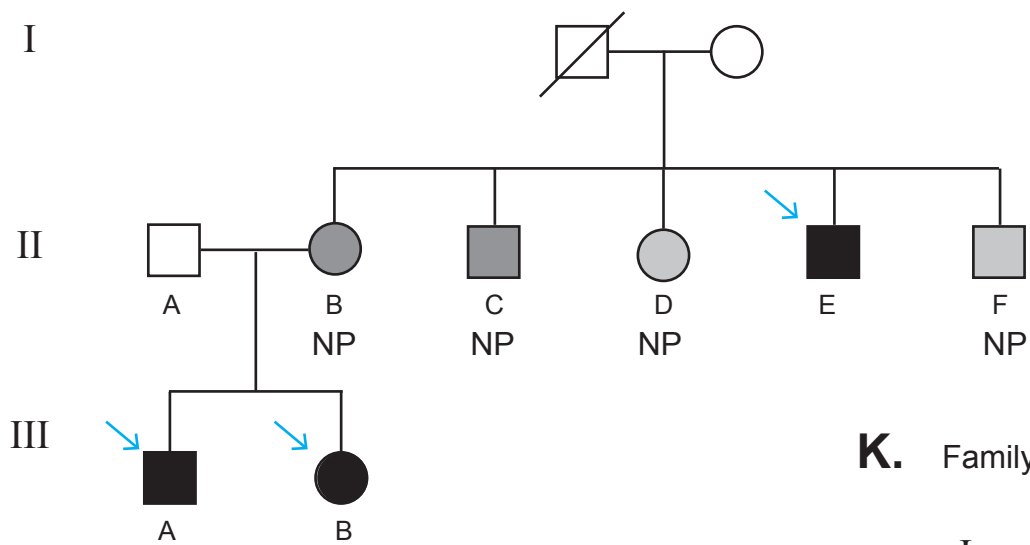

**K.** Family 13

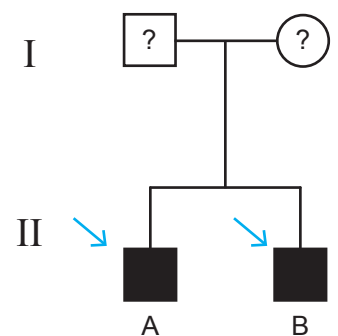

**L.** Family 14

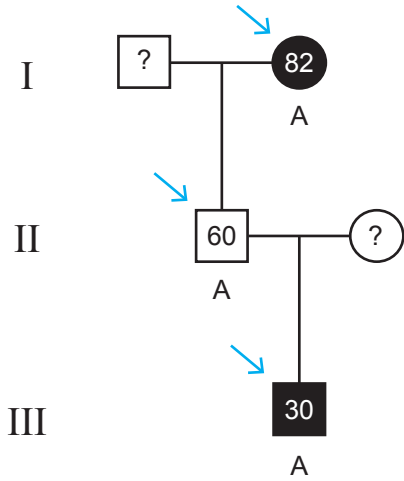

**M.** Family 15

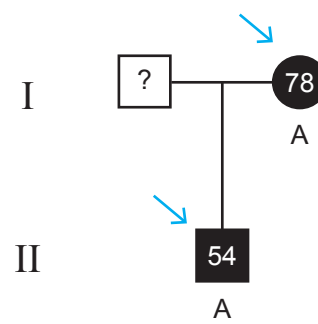

**N.** Family 16

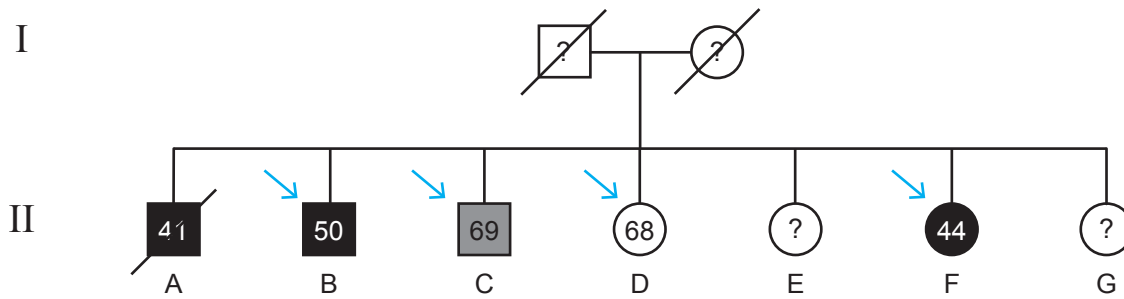

**O.** Family 17

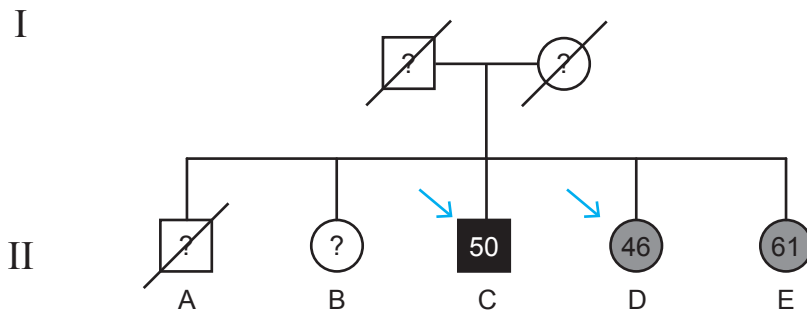

**P.** Family 18

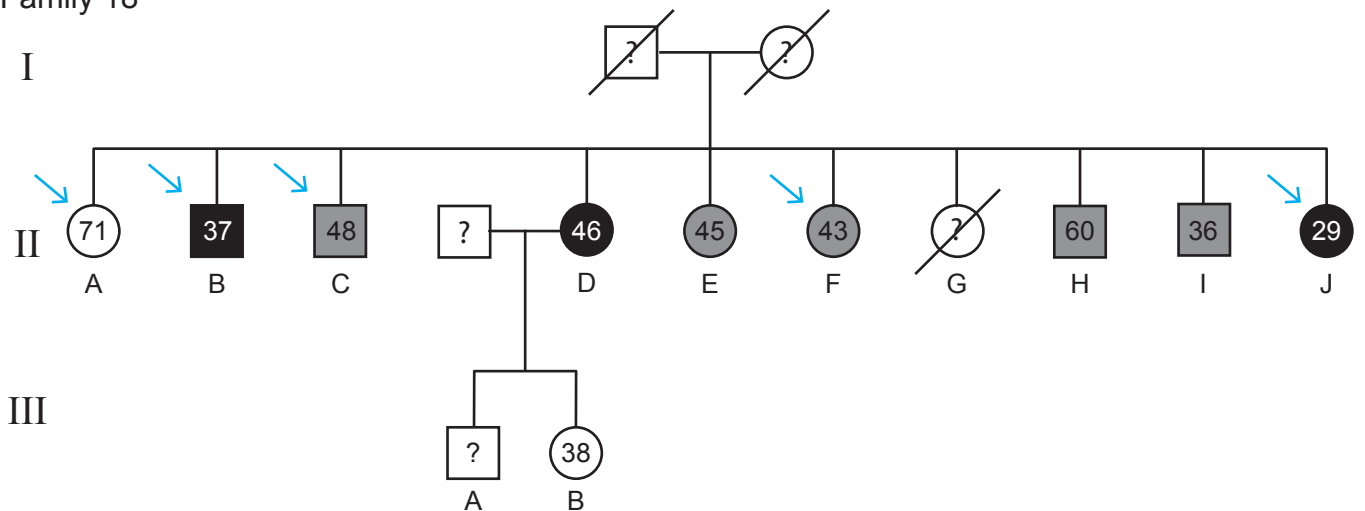

Supplement: MGG3-7-na-s001.pdf [file MGG3-7-na-s001.pdf]
